# Supplementary material
Source: publisher figshare collection journal article supplement (https://sage.figshare.com/ndownloader/files/17430395)
Supplement: Supplementary file 1 [file 17430395]

sorry	my	co	co
my	darling	co	co
oop		co
have	you	aux	pro:per
you	get&PAST	pro:per	v
get&PAST	a	v	det:art
a	cough	det:art	n
Mummy	be&3S	n:prop	aux
be&3S	go-PRESP	aux	part
go-PRESP	to	part	prep
to	the	prep	det:art
the	toilet	det:art	n
toilet	darling	n	co
hello	darling	co	co
yeah	Mama	co	n:prop
Mama	be&3S	n:prop	aux
be&3S	go-PRESP	aux	part
go-PRESP	to	part	inf
to	take	inf	v
take	your	v	det:poss
your	nappie	det:poss	n
nappie	off	n	adv
oop		co
bad	cough	adj	n
oh		co
so	you	adv	pro:per
you	have	pro:per	aux
have	get&PASTP	aux	part
get&PASTP	a	part	det:art
a	bad	det:art	adj
bad	cough	adj	n
so	do	adv	mod
do	not	mod	neg
not	touch	neg	v
touch	the	v	det:art
the	clock	det:art	n
clock	good	n	adj
good	girl	adj	n
girl	because	n	conj
because	it	conj	pro:per
it	will&COND	pro:per	mod
will&COND	break	mod	v
break	if	v	conj
if	you	conj	pro:per
you	touch	pro:per	v
touch	the	v	det:art
the	clock	det:art	n
ah		co
yes		co
we	know	pro:sub	v
know	they	v	pro:sub
they	be&PRES	pro:sub	aux
be&PRES	yours	aux	pro:poss
yours	darling	pro:poss	co
be&3S	that	cop	pro:dem
that	good&CP	pro:dem	adj
you	know	pro:per	v
know	where	v	pro:rel
where	be&3S	pro:rel	aux
be&3S	Eleanor	aux	n:prop
Eleanor	go-PRESP	n:prop	part
go-PRESP	today	part	adv:tem
who	you	pro:int	pro:per
you	go-PRESP	pro:per	part
go-PRESP	to	part	inf
to	see	inf	v
the	Tweenies	det:art	n:prop
luck&dn-Y	girl	adj	n
you	go-PRESP	pro:per	part
go-PRESP	with	part	prep
dad		n
the	Tweenies	det:art	n:prop
Tweenies	be&PRES	n:prop	aux
be&PRES	go-PRESP	aux	part
go-PRESP	to	part	inf
to	sing	inf	v
sing	on	v	prep
on	stage	prep	n
oh	Eleanor	co	n:prop
Eleanor	can	n:prop	n
can	Mama	n	n:prop
Mama	come	n:prop	v
oh		co
oh	please	co	co
but	Mama	conj	n:prop
Mama	want-3S	n:prop	v
want-3S	to	v	inf
to	see	inf	v
see	the	v	det:art
the	Tweenies	det:art	n:prop
Tweenies	as	n:prop	conj
as	well	conj	adv
alright		co
oh	Mama	co	n:prop
Mama	be	n:prop	cop
be	by	cop	prep
by	herself	prep	pro:refl
herself	then	pro:refl	adv:tem
get	some	v	qn
some	cream	qn	n
you	be&PRES	pro:per	cop
be&PRES	welcome	cop	adj
welcome	my	adj	det:poss
my	darling	det:poss	co
Eleanor		n:prop
there	you	adv	pro:per
you	go	pro:per	v
Eleanor		n:prop
not	in	neg	prep
in	your	prep	det:poss
your	mouth	det:poss	n
mouth	please	n	co
please	you	co	pro:per
you	do	pro:per	mod
do	not	mod	neg
not	put&ZERO	neg	v
put&ZERO	cream	v	n
cream	in	n	prep
in	your	prep	det:poss
your	mouth	det:poss	n
Eleanor	what	n:prop	pro:int
what	do&PAST	pro:int	mod
do&PAST	Mama	mod	n:prop
Mama	say	n:prop	v
no	cream	qn	n
cream	in	n	prep
in	your	prep	det:poss
your	mouth	det:poss	n
mouth	please	n	co
it	be&3S	pro:per	cop
be&3S	dangerous	cop	adj
it	be&3S	pro:per	cop
be&3S	not	cop	neg
not	love&dn-LY	neg	adj
you	do	pro:per	mod
do	not	mod	neg
not	eat	neg	v
eat	cream	v	n
shh		co
Dada	be&3S	n:prop	aux
be&3S	go&PASTP	aux	part
go&PASTP	to	part	prep
to	the	prep	det:art
the	gym	det:art	n
gym	darling	n	co
Eleanor	Dada	n:prop	n:prop
Dada	s	n:prop	poss
s	go&PASTP	poss	part
go&PASTP	to	part	prep
to	the	prep	det:art
the	gym	det:art	n
Dada	be&3S	n:prop	aux
be&3S	go&PASTP	aux	part
go&PASTP	to	part	prep
to	the	prep	det:art
the	gym	det:art	n
gym	my	n	det:poss
my	darling	det:poss	co
you	come	pro:per	v
come	here	v	adv
oh	thank	co	v
thank	you	v	pro:per
for	what	conj	pro:int
what	be&3S	pro:int	cop
be&3S	this	cop	pro:dem
sorry	darling	co	co
no	that	co	pro:dem
that	be&3S	pro:dem	cop
be&3S	a	cop	det:art
a	new	det:art	adj
that	be&3S	pro:dem	cop
be&3S	sick	cop	adj
okay		co
I	will	pro:sub	mod
will	get	mod	v
get	a	v	det:art
a	clean	det:art	adj
clean	one	adj	pro:indef
be&3S	this	cop	pro:dem
this	a	pro:dem	det:art
a	nice	det:art	adj
nice	one	adj	pro:indef
smell		n
that	be&3S	pro:dem	cop
be&3S	nice	cop	adj
Eleanor		n:prop
Eleanor	listen	n:prop	v
listen	to	v	prep
to	me	prep	pro:obj
put&ZERO	your	v	det:poss
your	vest	det:poss	n
vest	on	n	adv
on	because	adv	conj
because	you	conj	pro:per
you	know	pro:per	v
know	outside	v	adv
outside	it	adv	pro:per
it	be&3S	pro:per	cop
be&3S	very	cop	adv
very	cold	adv	adv
Mr	nice	n:prop	adj
nice	clean	adj	adj
it	be&3S	pro:per	aux
be&3S	not	aux	neg
it	be&3S	pro:per	aux
be&3S	not	aux	neg
it	be&3S	pro:per	aux
be&3S	out	aux	adv
out	of	adv	prep
of	the	prep	det:art
the	drawer	det:art	n
drawer	that	n	pro:rel
that	one	pro:rel	det:num
one	darling	det:num	co
it	be&3S	pro:per	cop
be&3S	clean	cop	adj
oh	this	co	pro:dem
this	be&3S	pro:dem	cop
be&3S	beautiful	cop	adj
oh	okay	co	co
okay	darling	co	co
dada	be&3S	n	aux
be&3S	go&PASTP	aux	part
go&PASTP	to	part	prep
to	the	prep	det:art
the	gym	det:art	n
gym	darling	n	co
exercise		n
be&3S	that	cop	pro:dem
that	paint	pro:dem	n
paint	on	n	prep
on	your	prep	det:poss
your	hand	det:poss	n
oh	look	co	co
look	that	co	pro:dem
that	be&3S	pro:dem	cop
be&3S	a	cop	det:art
a	nice	det:art	adj
nice	dress	adj	n
dress	for	n	prep
for	Eleanor	prep	n:prop
do	you	mod	pro:per
you	know	pro:per	v
know	who	v	pro:rel
who	give	pro:rel	v
give	you	v	pro:per
you	that	pro:per	pro:dem
that	dress	pro:dem	n
Auntie	Aktar	n:prop	n:prop
hm		co
she	give&PAST	pro:sub	v
give&PAST	you	v	pro:per
oh	where	co	adv:int
where	be&3S	adv:int	cop
be&3S	the	cop	det:art
the	brush	det:art	n
brush	go&PASTP	n	part
where	be&3S	adv:int	cop
be&3S	Eleanor'sbrush	cop	n:prop
Eleanor'sbrush	go&PASTP	n:prop	part
will	we	mod	pro:sub
we	find	pro:sub	v
find	it	v	pro:per
oh	no	co	co
no	we	co	pro:sub
we	have	pro:sub	aux
have	lose&PAST	aux	v
lose&PAST	Eleanor'sbrush	v	n:prop
have	you	v	pro:per
no	not	co	neg
not	today	neg	adv:tem
today	darling	adv:tem	co
you	know	pro:per	v
know	what	v	pro:int
what	we	pro:int	pro:sub
we	be&PRES	pro:sub	aux
be&PRES	go-PRESP	aux	part
go-PRESP	to	part	inf
to	do	inf	v
do	later	v	adv
later	on	adv	adv
on	today	adv	adv:tem
make	some	v	qn
some	nice	qn	adj
nice	new	adj	adj
new	play	adj	n
play	dough	n	n
there	you	adv	pro:per
you	go	pro:per	v
not	yet	neg	adv
no	not	co	neg
not	now	neg	adv
you	have	pro:per	v
have	to	v	inf
to	have	inf	v
have	your	v	det:poss
your	breakfast	det:poss	n
breakfast	first	n	adv
Eleanor	will&COND	n:prop	mod
will&COND	you	mod	pro:per
you	like	pro:per	v
like	to	v	inf
to	have	inf	v
have	some	v	qn
some	egg	qn	n
egg	and	n	coord
and	toast	coord	n
toast	today	n	adv:tem
today	for	adv:tem	conj
for	breakfast	conj	n
breakfast	yeah	n	co
you	can	pro:per	mod
can	dip	mod	v
dip	the	v	det:art
the	egg	det:art	n
egg	in	n	prep
in	the	prep	det:art
the	bread	det:art	n
you	like	pro:per	prep
like	it	prep	pro:per
it	if	pro:per	conj
if	Mama	conj	n:prop
Mama	make	n:prop	v
make	you	v	pro:per
you	one	pro:per	pro:indef
okay	I	co	pro:sub
I	will	pro:sub	mod
will	make	mod	v
make	it	v	pro:per
it	a	pro:per	det:art
a	nice	det:art	adj
nice	egg	adj	n
okay		co
wait	a	v	det:art
a	minute	det:art	n
yes	darling	co	co
sorry	darling	co	co
you	want	pro:per	v
want	to	v	inf
to	put&ZERO	inf	v
put&ZERO	those	v	pro:dem
those	sock-PL	pro:dem	n
sock-PL	on	n	adv
hm		co
what	do	pro:int	mod
do	you	mod	pro:per
you	say	pro:per	v
say	when	v	conj
when	we	conj	pro:sub
we	put&ZERO	pro:sub	v
put&ZERO	my	v	det:poss
my	sock-PL	det:poss	n
sock-PL	on	n	adv
please		co
ah		co
good	girl	adj	n
this	one	pro:dem	pro:indef
one	be&3S	pro:indef	cop
be&3S	a	cop	det:art
a	left	det:art	n
left	foot	n	n
you	be&PRES	pro:per	aux
be&PRES	a	aux	det:art
a	clever	det:art	adj
clever	little	adj	adj
little	girl	adj	n
girl	be&PRES	n	aux
be&PRES	not	aux	neg
not	you	neg	pro:per
that	there	pro:rel	adv
there	ooh	adv	v
wait	a	v	det:art
a	minute	det:art	n
Mum	put&ZERO	n:prop	v
put&ZERO	her	v	det:poss
her	sock-PL	det:poss	n
sock-PL	on	n	adv
which	foot	pro:rel	n
foot	s	n	poss
s	that	poss	pro:dem
and	her	coord	det:poss
her	slipper-PL	det:poss	n
I	be&1S	pro:sub	aux
be&1S	just	aux	adv
just	go-PRESP	adv	part
go-PRESP	to	part	prep
to	the	prep	det:art
the	toilet	det:art	n
toilet	darling	n	co
can	you	mod	pro:per
you	put&ZERO	pro:per	v
put&ZERO	this	v	pro:dem
this	in	pro:dem	prep
in	the	prep	det:art
the	bin	det:art	n
bin	darling	n	co
thank	you	v	pro:per
oh	look	co	v
look	Eleanor	v	n:prop
Eleanor	what	n:prop	pro:int
what	be&3S	pro:int	cop
be&3S	that	cop	pro:dem
that	darling	pro:dem	co
and	what	coord	pro:int
what	color-PL	pro:int	n
color-PL	can	n	mod
can	you	mod	pro:per
you	see	pro:per	v
see	in	v	prep
in	it	prep	pro:per
ah	do&PAST	co	v
do&PAST	you	v	pro:per
you	make	pro:per	v
how	will&COND	adv:int	mod
will&COND	you	mod	pro:per
you	say	pro:per	v
say	bq	v	bq
bq	I	bq	pro:sub
I	make&PAST	pro:sub	v
make&PAST	it	v	pro:per
it	Mama	pro:per	n:prop
Mama	eq	n:prop	eq
Eleanor	where	n:prop	pro:rel
where	be&PRES	pro:rel	aux
be&PRES	you	aux	pro:per
Eleanor	do	n:prop	mod
do	not	mod	neg
not	do	neg	v
do	that	v	pro:dem
Eleanor		n:prop
be&3S	that	cop	pro:rel
that	your	pro:rel	det:poss
your	jacket	det:poss	n
put&ZERO	your	v	det:poss
your	jacket	det:poss	n
jacket	on	n	adv
then	shall	adv:tem	mod
shall	we	mod	pro:sub
we	make	pro:sub	v
make	a	v	det:art
a	egg	det:art	n
then	we	adv:tem	pro:sub
we	can	pro:sub	mod
can	put&ZERO	mod	v
put&ZERO	toast	v	n
toast	on	n	adv
good&CP	hm	adv	co
it	be&3S	pro:per	aux
be&3S	break&PASTP	aux	part
yeah	we	co	pro:sub
we	will	pro:sub	mod
will	ask	mod	v
ask	Dada	v	n:prop
Dada	to	n:prop	inf
to	fix	inf	v
fix	it	v	pro:per
oh	one	co	det:num
one	egg	det:num	n
egg	leave&PAST	n	v
there	be&3S	pro:exist	cop
be&3S	that	cop	pro:dem
that	one	pro:dem	pro:indef
one	there	pro:indef	adv
you	can	pro:per	mod
can	dip	mod	v
dip	in	v	prep
in	a	prep	det:art
a	egg	det:art	n
egg	today	n	adv:tem
you	can	pro:per	mod
can	dip	mod	n
dip	toast	n	n
toast	in	n	prep
in	a	prep	det:art
a	egg	det:art	n
toast	in	n	prep
in	the	prep	det:art
the	toast&dv-AGT	det:art	n
oh		co
you	will	pro:per	mod
will	spoil	mod	v
spoil	the	v	det:art
the	egg	det:art	n
you	mix	pro:per	v
mix	flour	v	n
flour	with	n	prep
with	it	prep	pro:per
no		co
that	be&3S	pro:dem	cop
be&3S	a	cop	det:art
a	different	det:art	adj
a	wooden	det:art	adj
wooden	spoon	adj	n
shall	we	mod	pro:sub
we	put&ZERO	pro:sub	v
put&ZERO	the	v	det:art
the	egg	det:art	n
egg	in	n	adv
in	now	adv	adv
oh	look	co	co
look	egg	co	n
egg	Eleanor	n	n:prop
now	you	adv	pro:per
you	can	pro:per	mod
can	dip	mod	v
dip	your	v	det:poss
your	what	det:poss	pro:int
what	be&3S	pro:int	aux
be&3S	call-PAST	aux	v
call-PAST	a	v	det:art
a	yolk	det:art	n
yolk	in	n	prep
in	the	prep	det:art
the	egg	det:art	n
okay		co
yolk		n
what	be&3S	pro:int	aux
be&3S	it	aux	pro:per
what	be&3S	pro:int	cop
be&3S	that	cop	pro:dem
a	yolk	det:art	n
yolk	good	n	adj
good	girl	adj	n
egg	yolk	n	n
just	the	adv	det:art
the	one	det:art	pro:indef
one	egg	pro:indef	n
for	a	conj	det:art
a	hour	det:art	n
hour	or	n	coord
or	two	coord	det:num
two	Eleanor'sgoing	det:num	n:prop
Eleanor'sgoing	to	n:prop	inf
to	eat	inf	v
eat	a	v	det:art
a	egg	det:art	n
egg	today	n	adv:tem
today	mm	adv:tem	co
love&dn-LY		adj
do	not	mod	neg
not	touch	neg	v
touch	it	v	pro:per
it	be&3S	pro:per	cop
be&3S	hot	cop	adj
what	be&3S	pro:int	cop
be&3S	this	cop	pro:dem
this	call-PASTP	pro:dem	part
no	but	co	conj
but	what	conj	pro:int
what	s	pro:int	poss
s	the	poss	det:art
the	yellow	det:art	adj
yellow	part	adj	n
part	call-PAST	n	v
yolk		n
what	be&3S	pro:int	aux
be&3S	the	aux	det:art
the	yellow	det:art	adj
yellow	part	adj	n
part	call-PAST	n	v
egg	yolk	n	n
good	girl	adj	n
egg	yolk	n	n
what	be&3S	pro:int	aux
be&3S	it	aux	pro:per
mm		co
it	be&3S	pro:per	cop
be&3S	nice	cop	adj
nice	egg	adj	n
egg	yolk	n	n
mm		co
Eleanor	be&3S	n:prop	cop
be&3S	not	cop	neg
not	it	neg	pro:per
it	a	pro:per	det:art
a	nice	det:art	adj
nice	egg	adj	n
alright	be	co	cop
be	very	cop	adv
very	careful	adv	co
we	will	pro:sub	mod
will	cut&ZERO	mod	v
cut&ZERO	the	v	det:art
the	toast	det:art	v
toast	up	v	adv
up	like	adv	prep
like	this	prep	pro:dem
need	some	v	qn
some	water	qn	n
that	be&3S	pro:dem	cop
be&3S	pasta	cop	n
pasta	darling	n	co
that	be&3S	pro:dem	cop
be&3S	dal	cop	L2
you	take	pro:per	v
take	your	v	det:poss
your	water	det:poss	n
Mama	bring	n:prop	v
bring	it	v	pro:per
it	over	pro:per	adv
come	on	v	adv
you	sit	pro:per	v
sit	down	v	adv
down	and	adv	coord
and	I	coord	pro:sub
I	will	pro:sub	mod
what	darling	pro:int	co
Mummy	will	n:prop	mod
will	do	mod	v
do	it	v	pro:per
okay	Mummy	co	n:prop
hang	on	v	adv
on	I	adv	pro:sub
I	will	pro:sub	mod
will	push	mod	v
push	it	v	pro:per
it	back	pro:per	adj
back	for	adj	prep
for	you	prep	pro:per
there	you	adv	pro:per
you	go	pro:per	v
no	need	co	v
need	to	v	inf
to	cry	inf	v
cry	darling	v	co
you	do	pro:per	mod
do	not	mod	neg
not	want	neg	v
want	to	v	inf
to	watch	inf	v
watch	Winnie_pooh	v	n:prop
well	you	co	pro:per
you	dip	pro:per	v
dip	your	v	det:poss
your	toast	det:poss	n
toast	in	n	prep
in	your	prep	det:poss
your	egg	det:poss	n
egg	now	n	adv
you	do	pro:per	v
do	it	v	pro:per
pick	this	v	pro:dem
this	up	pro:dem	adv
up	and	adv	coord
and	then	coord	adv:tem
then	you	adv:tem	pro:per
you	dip	pro:per	v
dip	it	v	pro:per
it	in	pro:per	prep
in	there	prep	adv
dip	dip	n	n
there	look	adv	v
look	you	v	pro:per
you	do	pro:per	v
do	it	v	pro:per
there		adv
you	eat	pro:per	v
eat	it	v	pro:per
it	now	pro:per	adv
now	you	adv	pro:per
you	eat	pro:per	v
eat	it	v	pro:per
bite		n
be&3S	that	cop	pro:dem
that	nice	pro:dem	adj
dip	this	v	pro:dem
this	one	pro:dem	pro:indef
you	dip	pro:per	v
dip	that	v	pro:dem
that	one	pro:dem	pro:indef
egg		n
egg	yolk	n	n
big	bite	adj	n
oop		co
be&3S	that	cop	pro:dem
that	nice	pro:dem	adj
be&3S	it	aux	pro:per
it	nice	pro:per	adj
nice	darling	adj	co
you	dip	pro:per	v
dip	it	v	pro:per
it	in	pro:per	prep
in	there	prep	adv
you	dip	pro:per	v
dip	it	v	pro:per
it	in	pro:per	prep
in	the	prep	det:art
the	yolk	det:art	n
big	bite	adj	n
good	girl	adj	n
what	be&3S	pro:int	cop
be&3S	this	cop	pro:dem
this	darling	pro:dem	co
what	be&3S	pro:int	cop
be&3S	this	cop	pro:dem
this	call-PASTP	pro:dem	part
no	Mama	co	n:prop
what	be&3S	pro:int	aux
be&3S	he	aux	pro:sub
he	do-PRESP	pro:sub	part
what	be&3S	pro:int	aux
be&3S	Pooh_bear	aux	n:prop
Pooh_bear	do-PRESP	n:prop	part
do-PRESP	hm	part	co
you	can	pro:per	mod
can	dip	mod	v
dip	this	v	pro:dem
this	one	pro:dem	pro:indef
one	darling	pro:indef	co
Eleanor		n:prop
Eleanor		n:prop
dip	this	v	pro:dem
this	one	pro:dem	pro:indef
in	the	prep	det:art
the	yolk	det:art	n
like	some	prep	qn
some	water	qn	n
careful		co
now	you	adv	pro:per
you	dip	pro:per	v
dip	this	v	pro:dem
this	one	pro:dem	pro:indef
one	in	pro:indef	adv
dip	this	v	pro:dem
this	toast	pro:dem	n
Eleanor		n:prop
what	do	det:int	v
dip	big	n	adj
big	bite	adj	n
good	girl	adj	n
do	you	mod	pro:per
you	like	pro:per	co
like	yolk	co	n
do	you	mod	pro:per
you	like	pro:per	co
like	yolk	co	n
yolk	darling	n	co
Eleanor		n:prop
do	you	mod	pro:per
you	like	pro:per	v
like	this	v	pro:dem
this	yolk	pro:dem	n
be&3S	it	aux	pro:per
it	nice	pro:per	adj
be&3S	the	cop	det:art
the	yolk	det:art	n
yolk	nice	n	adj
hm		co
be&PRES	you	cop	pro:per
you	go-PRESP	pro:per	part
go-PRESP	to	part	inf
to	tell	inf	v
tell	Dada	v	n:prop
Dada	what	n:prop	pro:int
what	do&PAST	pro:int	mod
do&PAST	you	mod	pro:per
you	eat	pro:per	v
eat	today	v	adv:tem
egg	yolk	n	n
dip	dip	n	n
come	on	v	adv
on	dip	adv	n
dip	please	n	co
bread	in	n	adv
Eleanor	dip	n:prop	n
dip	your	n	det:poss
your	bread	det:poss	n
bread	in	n	prep
in	darling	prep	co
big	bite	adj	n
big	bite	adj	n
good	girl	adj	n
dip	it	v	pro:per
it	in	pro:per	adv
Eleanor	dip	n:prop	n
dip	it	n	pro:per
it	in	pro:per	prep
in	darling	prep	co
Eleanor	be&PRES	n:prop	aux
be&PRES	you	aux	pro:per
you	go-PRESP	pro:per	part
go-PRESP	to	part	inf
to	see	inf	v
see	Tweenie-PL	v	n:prop
Tweenie-PL	today	n:prop	adv:tem
ah		co
you	be&PRES	pro:per	aux
be&PRES	a	aux	det:art
a	luck&dn-Y	det:art	adj
luck&dn-Y	girl	adj	n
ooh	what	v	pro:int
what	s	pro:int	poss
s	happen-PASTP	poss	part
Eleanor	what	n:prop	pro:int
what	happen-PAST	pro:int	v
happen-PAST	to	v	prep
to	Pooh_bear	prep	n:prop
Pooh_bear	darling	n:prop	co
Eleanor		n:prop
Eleanor	what	n:prop	pro:int
what	be&3S	pro:int	aux
be&3S	happen-PAST	aux	v
happen-PAST	to	v	prep
to	Pooh_bear	prep	n:prop
he	be&3S	pro:sub	aux
be&3S	fall&PASTP	aux	part
fall&PASTP	down	part	adv
big	bite	adj	n
come	on	v	adv
on	Eleanor	adv	n:prop
there	you	adv	pro:per
you	go	pro:per	v
that	be&3S	pro:dem	cop
be&3S	fine	cop	adj
oh		co
you	okay	pro:per	co
good	girl	adj	n
who	s	pro:int	poss
s	on	poss	prep
on	your	prep	det:poss
your	slipper-PL	det:poss	n
slipper-PL	darling	n	co
Eleanor	who	n:prop	pro:int
who	s	pro:int	poss
s	on	poss	prep
on	your	prep	det:poss
your	slipper-PL	det:poss	n
and	which	coord	pro:rel
which	one	pro:rel	pro:indef
who	be&3S	pro:int	cop
be&3S	that	cop	pro:dem
what	be&3S	pro:int	cop
be&3S	this	cop	pro:dem
this	Teletubby	pro:dem	n:prop
Teletubby	s	n:prop	poss
s	name	poss	n
what	color	pro:int	n
color	be&3S	n	cop
be&3S	LaLa	cop	n:prop
right		co
oh		co
what	be&3S	pro:int	aux
be&3S	happen-PASTP	aux	part
ooh	he	v	pro:sub
he	be&3S	pro:sub	aux
be&3S	go&PASTP	aux	part
go&PASTP	up	part	adv
up	in	adv	prep
in	the	prep	det:art
the	sky	det:art	n
sky	with	n	prep
with	the	prep	det:art
the	balloon	det:art	n
ooh	he	v	pro:sub
he	be&3S	pro:sub	aux
be&3S	crawl-PRESP	aux	part
crawl-PRESP	in	part	prep
in	the	prep	det:art
the	mud	det:art	n
this	be&3S	pro:dem	cop
be&3S	your	cop	det:poss
your	dip	det:poss	n
dip	dip	n	n
dip	darling	n	co
Eleanor		n:prop
Eleanor		n:prop
who	be&3S	pro:int	cop
be&3S	that	cop	pro:dem
who	be&3S	pro:int	cop
be&3S	that	cop	pro:dem
that	darling	pro:dem	co
oh	who	co	pro:int
who	be&3S	pro:int	cop
be&3S	that	cop	pro:dem
oh	what	co	pro:int
what	be&3S	pro:int	aux
be&3S	happen-PAST	aux	v
happen-PAST	to	v	prep
to	Pooh_bear	prep	n:prop
Eleanor	what	n:prop	pro:int
what	be&3S	pro:int	aux
be&3S	happen-PAST	aux	v
happen-PAST	to	v	prep
to	Pooh_bear	prep	n:prop
Pooh_bear	cover-PAST	n:prop	v
cover-PAST	in	v	prep
in	mud	prep	n
oh	no	co	co
no	Eleanor	co	n:prop
Eleanor	get-3S	n:prop	v
get-3S	mud	v	n
mud	on	n	prep
on	her	prep	det:poss
her	shoe-PL	det:poss	n
shoe-PL	sometimes	n	adv
sometimes	do	adv	mod
do	not	mod	neg
not	you	neg	pro:per
and	what	coord	pro:int
what	do	pro:int	mod
do	we	mod	pro:sub
we	do	pro:sub	v
do	do	v	mod
do	we	mod	pro:sub
we	clean	pro:sub	v
clean	it	v	pro:per
there	be&3S	pro:exist	cop
be&3S	the	cop	det:art
the	water	det:art	n
water	there	n	adv
dip	it	v	pro:per
it	now	pro:per	adv
now	Eleanor	adv	n:prop
Eleanor	dip	n:prop	n
dip	it	n	pro:per
big	bite	adj	n
big	bite	adj	n
bite	darling	n	co
good	girl	adj	n
ooh		v
what	be&3S	pro:int	aux
be&3S	happen-PAST	aux	v
happen-PAST	to	v	prep
to	your	prep	det:poss
your	leg	det:poss	n
leg	darling	n	co
here		adv
what	be&3S	pro:int	cop
be&3S	that	cop	pro:dem
a	spot	det:art	n
how	do&PAST	adv:int	mod
do&PAST	you	mod	pro:per
you	get	pro:per	v
get	that	v	pro:dem
that	spot	pro:dem	n
what	shall	pro:int	mod
shall	we	mod	pro:sub
we	do	pro:sub	v
shall	we	mod	pro:sub
we	put&ZERO	pro:sub	v
put&ZERO	some	v	qn
some	medicine	qn	n
medicine	on	n	prep
on	your	prep	det:poss
your	spot	det:poss	n
you	pick	pro:per	v
pick	up	v	prep
up	your	prep	det:poss
your	toast	det:poss	n
you	like	pro:per	v
like	to	v	inf
to	dip	inf	v
good	girl	adj	n
big	bite	adj	n
big	bite	adj	n
big	bite	adj	n
good	girl	adj	n
the	bee	det:art	n
bee	be&3S	n	aux
be&3S	laugh-PRESP	aux	part
what	sound	pro:int	n
sound	do	n	v
do	the	v	det:art
the	bee-PL	det:art	n
bee-PL	make	n	v
what	sound	pro:int	n
sound	do	n	v
do	bee-PL	v	n
bee-PL	make	n	v
make	darling	v	co
buzzzzz		on
ooh		v
what	sound	pro:int	n
sound	do&3S	n	v
do&3S	a	v	det:art
a	cow	det:art	n
cow	make	n	v
what	sound	pro:int	n
sound	do&3S	n	v
do&3S	a	v	det:art
a	cow	det:art	n
cow	make	n	v
moo		on
bite		n
big	bite	adj	n
good	girl	adj	n
big	bite	adj	n
bite	darling	n	co
bite		n
there	you	adv	pro:per
you	go	pro:per	v
oh	look	co	co
ah		co
what	be&3S	pro:int	aux
be&3S	happen-PAST	aux	v
happen-PAST	there	v	adv
oh	no	co	co
what	be&3S	pro:int	aux
be&3S	Pooh_bear	aux	n:prop
Pooh_bear	do-PRESP	n:prop	part
Pooh_bear	be&3S	n:prop	aux
be&3S	think-PRESP	aux	part
think		v
think		v
how	do&3S	adv:int	mod
do&3S	Eleanor	mod	n:prop
Eleanor	think	n:prop	v
oh	not	co	neg
not	on	neg	prep
on	your	prep	det:poss
your	head	det:poss	n
Mum	go	n:prop	v
go	get	v	v
get	a	v	det:art
a	tissue	det:art	n
very	sun&dn-Y	adv	adj
sun&dn-Y	outside	adj	adv
outside	we	adv	pro:sub
we	have	pro:sub	v
have	to	v	inf
to	go	inf	v
go	and	v	coord
and	do	coord	v
do	the	v	det:art
the	calendar	det:art	n
calendar	yet	n	adv
yet	do	adv	mod
do	not	mod	neg
not	we	neg	pro:sub
what	s	pro:int	poss
s	rabbit	poss	n
rabbit	eat-PRESP	n	part
Pooh_bear	s	n:prop	poss
s	honey	poss	n
what	be&3S	pro:int	aux
be&3S	Pooh_bear	aux	n:prop
Pooh_bear	go-PRESP	n:prop	part
go-PRESP	to	part	inf
to	eat	inf	v
eat	then	v	adv:tem
ooh		v
oh	lot-PL	co	n
lot-PL	of	n	prep
of	honey	prep	n
what	be&3S	pro:int	cop
be&3S	this	cop	pro:dem
this	call-PASTP	pro:dem	part
call-PASTP	darling	part	co
what	be&3S	pro:int	aux
be&3S	it	aux	pro:per
it	call-PAST	pro:per	v
yolk		n
egg	yolk	n	n
bite		n
you	bite	pro:per	v
bite	it	v	pro:per
it	darling	pro:per	co
oh	Pooh	co	n:prop
Pooh	get&PAST	n:prop	aux
get&PAST	stick&PASTP	aux	part
stick&PASTP	in	part	prep
in	the	prep	det:art
the	hole	det:art	n
want	some	v	qn
some	more	qn	qn
more	toast	qn	n
yeah	you	co	pro:per
you	have	pro:per	aux
have	almost	aux	adv
almost	finish-PASTP	adv	part
okay		co
good	girl	adj	n
girl	you	n	pro:per
you	have	pro:per	aux
have	finish-PASTP	aux	part
do&PAST	you	mod	pro:per
you	finish	pro:per	v
finish	all	v	adv
all	your	adv	det:poss
your	egg	det:poss	n
good	girl	adj	n
what	be&3S	pro:int	cop
be&3S	that	cop	pro:dem
that	darling	pro:dem	co
bear	name	n	n
name	be&3S	n	cop
be&3S	Pooh	cop	n:prop
be&3S	Winnie_pooh	cop	n:prop
Winnie_pooh	stick&PAST	n:prop	v
shall	we	mod	pro:sub
we	have	pro:sub	v
have	Winnie_the_pooh	v	n:prop
Winnie_the_pooh	out	n:prop	adv
last	one	adj	pro:indef
one	last	pro:indef	adj
last	one	adj	pro:indef
one	darling	pro:indef	co
open	Eleanor	adj	n:prop
right	shall	co	mod
shall	we	mod	pro:sub
we	go	pro:sub	v
go	we	v	pro:sub
we	will	pro:sub	mod
will	have	mod	v
have	to	v	inf
to	go	inf	v
go	and	v	coord
and	change	coord	v
change	the	v	det:art
the	calendar	det:art	n
calendar	darling	n	co
let	us	v	pro:obj
us	go	pro:obj	v
go	and	v	coord
and	change	coord	v
change	the	v	det:art
the	calendar	det:art	n
what	day	pro:int	n
day	be&3S	n	aux
be&3S	it	aux	pro:per
it	today	pro:per	adv:tem
it	be&3S	pro:per	cop
be&3S	the	cop	det:art
the	first	det:art	adj
first	of	adj	prep
of	April	prep	n:prop
April	and	n:prop	coord
and	Eleanor'sgoing	coord	n:prop
Eleanor'sgoing	to	n:prop	inf
to	go	inf	v
go	and	v	coord
and	see	coord	v
see	the	v	det:art
the	Tweenies	det:art	n:prop
Tweenies	so	n:prop	conj
so	we	conj	pro:sub
we	have	pro:sub	v
have	to	v	inf
to	go	inf	v
go	change	v	v
change	the	v	det:art
the	calendar	det:art	n
what	do&PAST	pro:int	mod
do&PAST	you	mod	pro:per
you	eat	pro:per	v
egg	yolk	n	n
be&PRES	you	cop	pro:per
you	go-PRESP	pro:per	part
go-PRESP	to	part	inf
to	tell	inf	v
tell	Dada	v	n:prop
Dada	that	n:prop	pro:rel
that	you	pro:rel	pro:per
you	have&PAST	pro:per	v
have&PAST	egg	v	n
egg	yolk	n	n
yolk	with	n	prep
with	toast	prep	n
come	on	v	adv
on	then	adv	adv:tem
I	be&1S	pro:sub	aux
be&1S	go-PRESP	aux	part
go-PRESP	to	part	inf
to	change	inf	v
change	the	v	det:art
the	calendar	det:art	n
come	on	v	prep
on	darling	prep	n
darling	let-3S	n	v
let-3S	change	v	n
change	the	n	det:art
the	calendar	det:art	n
wash	your	v	det:poss
your	hand-PL	det:poss	n
hand-PL	now	n	adv
now	Eleanor	adv	n:prop
wash	your	v	det:poss
your	other	det:poss	qn
other	hand	qn	n
do&PAST	you	v	pro:per
you	enjoy	pro:per	v
enjoy	your	v	det:poss
your	breakfast	det:poss	n
be&PAST&13S	it	cop	pro:per
it	nice	pro:per	adj
nice	mm	adj	co
Mummy	be&3S	n:prop	aux
be&3S	go-PRESP	aux	part
go-PRESP	to	part	inf
to	have	inf	v
have	some	v	qn
some	+n	qn	n
Dada	be&3S	n:prop	aux
be&3S	go&PASTP	aux	part
Mama	go	n:prop	v
go	and	v	coord
and	change	coord	v
change	the	v	det:art
the	calendar	det:art	n
you		pro:per
you	do	pro:per	v
I	do	pro:sub	mod
do	not	mod	neg
not	know	neg	v
know	where	v	adv:int
what	be&3S	pro:int	cop
be&3S	this	cop	pro:dem
no	we	co	pro:sub
we	be&PRES	pro:sub	aux
be&PRES	go-PRESP	aux	part
go-PRESP	to	part	inf
to	go	inf	v
go	in	v	prep
in	your	prep	det:poss
your	+n	det:poss	n
and	we	coord	pro:sub
we	will	pro:sub	mod
will	change	mod	v
change	the	v	det:art
the	calendar	det:art	n
my	banana	det:poss	n
there		adv
come	on	v	adv
on	then	adv	adv:tem
will&COND	you	mod	pro:per
you	like	pro:per	v
like	to	v	inf
to	change	inf	v
change	your	v	det:poss
your	calendar	det:poss	n
calendar	first	n	adv
come	on	v	adv
okay	what	co	det:int
what	day	det:int	n
day	be&3S	n	aux
be&3S	it	aux	pro:per
it	today	pro:per	adv:tem
it	be&3S	pro:per	aux
be&3S	Sunday	aux	n:prop
Sunday	today	n:prop	adv:tem
right	can	adv	mod
can	you	mod	pro:per
you	see	pro:per	v
see	S	v	n:let
Sunday	anywhere	n:prop	adv
anywhere	on	adv	prep
on	there	prep	adv
Sunday	on	n:prop	prep
on	there	prep	adv
there	S	adv	n:prop
S	S	n:prop	n:prop
S	Sunday	n:prop	n:prop
good	girl	adj	n
okay		co
pull		v
you	take	pro:per	v
take	Saturday	v	n:prop
Saturday	off	n:prop	adv
off	put&PASTP	adv	part
put&PASTP	Saturday	part	n:prop
Saturday	there	n:prop	adv
put&ZERO	Sunday	v	n:prop
Sunday	on	n:prop	prep
on	there	prep	adv
oh	clever	co	adj
clever	girl	adj	n
so	Sunday	co	n:prop
Sunday	it	n:prop	pro:per
it	be&3S	pro:per	cop
be&3S	the	cop	det:art
the	first	det:art	adj
one		pro:indef
first	of	adv	prep
of	April	prep	n:prop
can	you	mod	pro:per
you	see	pro:per	v
see	a	v	det:art
a	one	det:art	pro:indef
one	anywhere	pro:indef	adv
one		pro:indef
can	you	mod	pro:per
you	see	pro:per	v
see	a	v	det:art
a	one	det:art	pro:indef
one	anywhere	pro:indef	adv
anywhere	there	adv	adv
yes	good	co	adj
good	girl	adj	n
you	put&ZERO	pro:per	v
put&ZERO	that	v	det:dem
that	there	det:dem	adv
stick	it	v	pro:per
it	out	pro:per	adv
out	oh	adv	co
oh	what	co	pro:int
what	a	pro:int	det:art
a	clever	det:art	adj
Sunday	first	n:prop	adv
first	of	adv	prep
of	April	prep	n:prop
so	where	adv	pro:rel
where	be&3S	pro:rel	aux
be&3S	April	aux	n:prop
A	for	n:let	prep
for	April	prep	n:prop
A		n:let
yeah	how	co	adv:int
how	do	adv:int	mod
do	you	mod	pro:per
you	spell	pro:per	v
spell	April	v	n:prop
A	p	n:let	n:let
first	take	adv	v
take	March	v	n:prop
March	off	n:prop	adv
off	oh	adv	co
you	put&ZERO	pro:per	v
put&ZERO	April	v	n:prop
April	there	n:prop	adv
clever	girl	adj	n
first		adv
of	April	prep	n:prop
two	thousand	det:num	det:num
thousand	and	det:num	coord
and	one	coord	pro:indef
and	what	coord	pro:int
what	s	pro:int	poss
s	the	poss	det:art
the	day	det:art	n
day	like	n	prep
like	outside	prep	n
outside	be&3S	n	aux
be&3S	it	aux	pro:per
it	sun&dn-Y	pro:per	adj
or	be&3S	coord	aux
be&3S	it	aux	pro:per
it	rain-PRESP	pro:per	part
sun&dn-Y		adj
oh	sun	co	n
sun	be&3S	n	cop
be&3S	there	cop	adv
what	season	pro:int	n
season	be&3S	n	aux
be&3S	it	aux	pro:per
it	be&3S	pro:per	aux
be&3S	it	aux	pro:per
it	be&3S	pro:per	aux
be&3S	+n	aux	n
what	happen-3S	pro:int	v
happen-3S	in	v	prep
in	+n	prep	n
lot-PL	of	n	prep
of	flower-PL	prep	n
flower-PL	come	n	v
come	out	v	adv
out	do	adv	mod
do	not	mod	neg
not	they	neg	pro:sub
daffodil-PL		n
what	else	pro:int	post
ooh		v
ah		co
so	what	adv	pro:int
what	s	pro:int	poss
s	the	poss	det:art
the	day	det:art	n
day	today	n	adv:tem
ooh		v
what	day	pro:int	n
day	be&3S	n	aux
be&3S	it	aux	pro:per
it	today	pro:per	adv:tem
today	darling	adv:tem	co
what	be&3S	pro:int	aux
be&3S	the	aux	det:art
the	day	det:art	n
Sunday	what	n:prop	det:int
what	month	det:int	n
month	first	n	adv
first	of	adv	prep
of	April	prep	n:prop
and	it	coord	pro:per
it	be&3S	pro:per	cop
be&3S	+n	cop	n
+n	and	n	coord
and	it	coord	pro:per
it	be&3S	pro:per	cop
be&3S	very	cop	adv
very	sun&dn-Y	adv	adj
sun&dn-Y	outside	adj	adv
oh	you	co	pro:per
you	be&PRES	pro:per	cop
be&PRES	such	cop	qn
such	a	qn	det:art
a	clever	det:art	adj
clever	girl	adj	n
girl	your	n	det:poss
your	my	det:poss	det:poss
my	clever	det:poss	adj
clever	little	adj	adj
little	girl	adj	n
right		co
he	be&3S	pro:sub	aux
be&3S	go&PASTP	aux	part
go&PASTP	to	part	prep
to	the	prep	det:art
the	gym	det:art	n
gym	darling	n	co
which	one	pro:rel	pro:indef
one	darling	pro:indef	co
what		pro:int
what	be&3S	pro:int	aux
be&3S	the	aux	det:art
where		adv:int
no	there	co	adv
there	be&3S	adv	cop
be&3S	not	cop	neg
not	any	neg	qn
any	Tellytubbies	qn	n:prop
Tellytubbies	in	n:prop	prep
in	there	prep	adv
there	darling	adv	co
will&COND	you	mod	pro:per
you	like	pro:per	conj
like	the	conj	det:art
here	be&3S	pro:exist	cop
be&3S	your	cop	det:poss
your	plate	det:poss	n
plate	darling	n	co
oh	Eleanor	co	n:prop
what	shall	pro:int	mod
shall	we	mod	pro:sub
we	make	pro:sub	v
make	come	v	v
come	on	v	adv
what	be&3S	pro:int	aux
be&3S	Eleanor	aux	n:prop
Eleanor	go-PRESP	n:prop	part
go-PRESP	to	part	inf
to	make	inf	v
make	today	v	adv:tem
could	you	mod	pro:per
you	make	pro:per	v
make	Grandma	v	n:prop
Grandma	a	n:prop	det:art
a	nice	det:art	adj
nice	ooh	adj	v
what	be&3S	pro:int	aux
be&3S	Mama	aux	n:prop
Mama	eat-PRESP	n:prop	part
and		coord
Eleanor	eat	n:prop	v
eat	for	v	prep
for	breakfast	prep	n
what	do&PAST	pro:int	mod
do&PAST	you	mod	pro:per
you	have	pro:per	v
have	for	v	prep
for	breakfast	prep	n
egg	yolk	n	n
with	toast	prep	n
what	do&PAST	pro:int	mod
do&PAST	you	mod	pro:per
you	have	pro:per	v
yolk	with	n	prep
with	toast	prep	n
thank	you	v	pro:per
oh		co
oh	be&3S	co	cop
be&3S	bunny	cop	n
bunny	awake	n	adj
bunny	be&PRES	n	aux
be&PRES	you	aux	pro:per
you	awake	pro:per	adj
look		co
oh	what	co	pro:int
what	be&3S	pro:int	cop
be&3S	this	cop	pro:dem
this	darling	pro:dem	adj
darling	it	adj	pro:per
it	be&3S	pro:per	cop
be&3S	beautiful	cop	adj
beautiful	what	adj	pro:int
what	be&3S	pro:int	aux
be&3S	it	aux	pro:per
octopus		n
a	green	det:art	adj
green	octopus	adj	n
how	many	adv:int	qn
many	leg-PL	qn	n
leg-PL	do&3S	n	mod
do&3S	a	mod	det:art
a	octopus	det:art	n
octopus	have	n	v
eight	leg-PL	det:num	n
tall	tower	adj	n
ooh		v
be&3S	the	cop	det:art
the	aeroplane	det:art	n
aeroplane	on	n	prep
on	top	prep	n
top	of	n	prep
of	the	prep	det:art
the	tower	det:art	n
on	top	prep	n
that	be&3S	pro:dem	cop
be&3S	like	cop	conj
like	a	conj	det:art
a	chameleon	det:art	n
good	girl	adj	n
where	do&PAST	adv:int	mod
do&PAST	you	mod	pro:per
you	see	pro:per	v
see	a	v	det:art
a	chameleon	det:art	n
in	the	prep	det:art
the	aquarium	det:art	n
Eleanor	what	n:prop	det:int
what	color	det:int	n
color	be&PAST&13S	n	cop
be&PAST&13S	the	cop	det:art
the	chameleon	det:art	n
green		n
do&PAST	they	v	pro:sub
they	all	pro:sub	post
all	go	post	v
go	to	v	prep
to	the	prep	det:art
museum		n
what	do&PAST	pro:int	mod
do&PAST	you	mod	pro:per
you	see	pro:per	v
see	in	v	prep
in	the	prep	det:art
the	museum	det:art	n
museum	darling	n	co
be&PAST&13S	Auntie_Aktar	cop	n:prop
Auntie_Aktar	scare-PAST	n:prop	v
what	do&PAST	pro:int	mod
do&PAST	she	mod	pro:sub
she	see	pro:sub	v
ra		on
be&PAST&13S	Eleanor	cop	n:prop
Eleanor	scare-PAST	n:prop	v
Eleanor'sa	big	n:prop	adj
big	girl	adj	n
girl	be&PRES	n	aux
be&PRES	not	aux	neg
not	you	neg	pro:per
you	go-PRESP	pro:per	part
go-PRESP	to	part	inf
to	give	inf	v
give	Mama	v	n:prop
Mama	a	n:prop	det:art
a	big	det:art	adj
big	kiss	adj	n
look	at	cop	prep
at	that	prep	det:dem
that	all	det:dem	adv
all	go&PASTP	adv	part
oop		co
what	Eleanor	pro:int	n:prop
oh	look	co	co
look	you	co	pro:per
you	have	pro:per	aux
have	put&ZERO	aux	v
put&ZERO	the	v	det:art
the	yellow	det:art	n
yellow	on	n	prep
on	the	prep	det:art
the	one	det:art	pro:indef
no		co
hold	on	n	adv
let-3S	take	v	v
take	this	v	pro:dem
this	off	pro:dem	prep
purple	one	adj	pro:indef
orange	one	adj	pro:indef
oop		co
one	two	det:num	det:num
two	three	det:num	det:num
three	four	det:num	det:num
what	happen-PAST	pro:int	v
what	happen-PAST	pro:int	v
happen-PAST	to	v	prep
to	the	prep	det:art
the	tower	det:art	n
tower	oop	n	co
whey		n
you	be&PRES	pro:per	aux
be&PRES	a	aux	det:art
a	clever	det:art	adj
clever	girl	adj	n
put&ZERO	the	v	det:art
the	purple	det:art	n
purple	one	n	pro:indef
one	on	pro:indef	adv
and	the	coord	det:art
the	green	det:art	n
green	one	n	pro:indef
and	the	coord	det:art
the	yellow	det:art	n
yellow	one	n	pro:indef
you	want	pro:per	v
want	Mama	v	n:prop
Mama	to	n:prop	inf
to	help	inf	v
help	you	v	pro:per
there	you	adv	pro:per
you	go	pro:per	v
fall&PASTP	down	part	adv
what	happen-PAST	pro:int	v
what		pro:int
you	say	pro:per	v
say	sorry	v	adj
sorry	darling	adj	co
mm		co
when	I	conj	pro:sub
I	ask	pro:sub	v
ask	you	v	pro:per
you	to	pro:per	inf
to	say	inf	v
say	sorry	v	adj
sorry	you	adj	pro:per
you	do	pro:per	mod
do	not	mod	neg
not	say	neg	v
say	it	v	pro:per
it	do	pro:per	v
do	you	v	pro:per
when	I	conj	pro:sub
I	say	pro:sub	v
say	you	v	pro:per
you	should	pro:per	mod
should	say	mod	v
say	sorry	v	adj
sorry	your	adj	det:poss
and	the	coord	det:art
the	green	det:art	n
green	one	n	pro:indef
one	out	pro:indef	adv
out	roll	adv	n
roll	oop	n	co
shall	Mama	mod	n:prop
Mama	make	n:prop	v
make	you	v	pro:per
you	a	pro:per	det:art
a	man	det:art	n
let-3S	make	v	v
make	a	v	det:art
a	man	det:art	n
make	a	v	det:art
a	man	det:art	n
make	the	v	det:art
the	man	det:art	n
man	s	n	poss
s	head	poss	v
head	round	v	adv
round		adj
round		adj
there	be&3S	pro:exist	cop
be&3S	a	cop	det:art
a	man	det:art	n
man	s	n	poss
s	head	poss	n
and	then	coord	adv:tem
then	make	adv:tem	v
make	a	v	det:art
a	man	det:art	n
man	s	n	poss
s	eye-PL	poss	n
two	eye-PL	det:num	n
one		pro:indef
two		det:num
there	you	adv	pro:per
you	go	pro:per	v
and	make	coord	v
make	a	v	det:art
a	man	det:art	n
man	s	n	poss
s	nose	poss	n
there		adv
you	roll-PRESP	pro:per	part
roll-PRESP	it	part	pro:per
it	out	pro:per	adv
up	here	adv	adv
then	make	adv:tem	v
make	a	v	det:art
a	man	det:art	n
man	s	n	poss
s	mouth	poss	n
mouth	shall	n	mod
shall	we	mod	pro:sub
we	make	pro:sub	v
make	a	v	det:art
a	smiley	det:art	n
smiley	mouth	n	n
how	do	adv:int	mod
do	you	mod	pro:per
you	smile	pro:per	v
smile	you	v	pro:per
you	show	pro:per	v
show	Mama	v	n:prop
Mama	how	n:prop	adv:int
how	do	adv:int	mod
do	you	mod	pro:per
you	cry	pro:per	v
Eleanor	do&3S	n:prop	mod
do&3S	not	mod	neg
not	cry	neg	v
you	be&PAST	pro:per	cop
be&PAST	not	cop	neg
not	cry-PRESP	neg	part
cry-PRESP	this	part	pro:dem
this	morning	pro:dem	n
morning	be&PAST	n	cop
be&PAST	you	cop	pro:per
in	your	prep	det:poss
your	cot	det:poss	n
do&PAST	you	v	pro:per
you	just	pro:per	adj
just	play	adj	n
be&PAST	you	cop	pro:per
you	wait-PRESP	pro:per	part
wait-PRESP	for	part	prep
for	Mama	prep	n:prop
Mama	come&PAST	n:prop	v
come&PAST	in	v	prep
in	your	prep	det:poss
your	room	det:poss	n
room	do&PAST	n	mod
do&PAST	not	mod	neg
not	she	neg	pro:sub
ooh		v
some	shall	pro:indef	mod
shall	we	mod	pro:sub
we	make	pro:sub	v
make	some	v	qn
some	hair	qn	n
lot-PL	of	n	prep
of	hair	prep	n
he	be&3S	pro:sub	aux
be&3S	get&PASTP	aux	part
get&PASTP	lot-PL	part	n
lot-PL	of	n	prep
of	hair	prep	n
ooh		v
there	you	adv	pro:per
you	go	pro:per	v
and	what	coord	pro:int
what	about	pro:int	prep
about	some	prep	qn
some	arm-PL	qn	n
arm-PL		n
and	another	coord	qn
another	one	qn	pro:indef
how	many	adv:int	qn
many	arm-PL	qn	n
arm-PL	have&3S	n	aux
have&3S	Eleanor	aux	n:prop
Eleanor	get&PAST	n:prop	v
one		pro:indef
how	many	adv:int	qn
many	arm-PL	qn	n
arm-PL	Mama	n	n:prop
Mama	get&PAST	n:prop	v
count	Mama	n	n:prop
Mama	s	n:prop	poss
s	arm-PL	poss	n
Eleanor		n:prop
two		det:num
some	arm-PL	qn	n
roll		n
roll	roll	n	n
roll	there	n	adv
there	you	adv	pro:per
you	go	pro:per	v
hold	on	n	adv
there	you	adv	pro:per
you	go	pro:per	v
go	oop	v	co
have	you	aux	pro:per
you	enjoy-PAST	pro:per	v
enjoy-PAST	clean-PRESP	v	n:gerund
what	do&PAST	pro:int	mod
do&PAST	you	mod	pro:per
you	clean	pro:per	v
clean	your	v	det:poss
your	nose	det:poss	n
nose	with	n	prep
you	have	pro:per	aux
have	not	aux	neg
not	eat&PASTP	neg	part
eat&PASTP	your	part	det:poss
your	Rice_krispies	det:poss	n:prop
oh	hello	co	n
hello	man	n	n
what	shall	pro:int	mod
shall	we	mod	pro:sub
we	call	pro:sub	v
call	this	v	pro:dem
this	man	pro:dem	n
Bob	build&dv-AGT	n:prop	n
hello	Bob	co	n:prop
Bob	build&dv-AGT	n:prop	n
shall	we	mod	pro:sub
we	put&ZERO	pro:sub	v
put&ZERO	some	v	qn
some	button-PL	qn	n
button-PL	on	n	prep
on	his	prep	det:poss
his	jacket	det:poss	n
one	button	det:num	n
two	button-PL	det:num	n
three	oop	det:num	co
three	button-PL	det:num	n
oop		co
be	careful	aux	co
careful	watch	co	v
watch	you	v	pro:per
you	do	pro:per	mod
do	not	mod	neg
not	break	neg	v
break	his	v	det:poss
his	arm	det:poss	n
there	you	adv	pro:per
you	go	pro:per	v
do		v
hello	Eleanor	co	n:prop
Eleanor	what	n:prop	pro:int
what	s	pro:int	poss
s	your	poss	det:poss
your	name	det:poss	n
Eleanor		n:prop
Mrs	Broom	n:prop	n:prop
Broom	and	n:prop	coord
what	be&3S	pro:int	aux
and	what	coord	pro:int
what	s	pro:int	poss
s	your	poss	det:poss
your	Mama	det:poss	n:prop
Mama	s	n:prop	poss
s	name	poss	n
and	what	coord	pro:int
what	s	pro:int	poss
s	your	poss	det:poss
your	Dada	det:poss	n:prop
Dada	s	n:prop	poss
s	name	poss	n
what	be&3S	pro:int	aux
be&3S	Dada	aux	n:prop
Dada	s	n:prop	poss
s	name	poss	n
Swww		n:prop
good	girl	adj	n
you	be&PRES	pro:per	aux
be&PRES	a	aux	det:art
a	clever	det:art	adj
clever	little	adj	adj
little	girl	adj	n
and	I	coord	pro:sub
I	might	pro:sub	mod
might	come	mod	v
come	and	v	coord
and	see	coord	v
see	you	v	pro:per
you	later	pro:per	adv
later	on	adv	adv
on	I	adv	pro:sub
I	might	pro:sub	mod
might	just	mod	adv
just	go	adv	v
go	to	v	prep
to	sleep	prep	n
sleep	now	n	adv
oop	it	co	pro:per
it	be&3S	pro:per	cop
be&3S	wake	cop	n
wake	up	n	adv
up	time	adv	n
think	I	v	pro:sub
I	will	pro:sub	mod
will	have	mod	v
have	a	v	det:art
a	dance	det:art	n
dance	now	n	adv
turn	around	n	adv
around	whoo	adv	co
whoo	Simon	co	n:prop
Simon	say-3S	n:prop	v
say-3S	turn	v	n
turn	around	n	adv
around	oop	adv	co
Simon	say-3S	n:prop	v
say-3S	jump	v	n
jump	oop	n	co
Simon	say-3S	n:prop	v
say-3S	go	v	v
go	to	v	prep
to	sleep	prep	n
sleep	sleep	n	n
Simon	say-3S	n:prop	v
say-3S	give	v	v
give	Eleanor	v	n:prop
Eleanor	a	n:prop	det:art
a	kiss	det:art	n
kiss	there	n	adv
there	you	adv	pro:per
you	go	pro:per	v
what	be&PRES	pro:int	aux
be&PRES	you	aux	pro:per
you	make-PRESP	pro:per	part
make-PRESP	darling	part	co
hm		co
you	can	pro:per	mod
can	cut&ZERO	mod	v
cut&ZERO	it	v	pro:per
it	with	pro:per	prep
with	the	prep	det:art
the	scissors	det:art	n
scissors	if	n	conj
if	you	conj	pro:per
you	like	pro:per	co
you	can	pro:per	mod
can	cut&ZERO	mod	v
cut&ZERO	this	v	pro:dem
this	look	pro:dem	v
you	do	pro:per	v
do	it	v	pro:per
it	you	pro:per	pro:per
you	can	pro:per	mod
can	cut&ZERO	mod	v
cut&ZERO	it	v	pro:per
there		adv
cut&ZERO	it	v	pro:per
it	out	pro:per	adv
there	be&3S	pro:exist	cop
be&3S	a	cop	det:art
a	drawing	det:art	n
drawing	pin	n	n
it	be&3S	pro:per	aux
be&3S	fall&PASTP	aux	part
fall&PASTP	down	part	adv
there	you	adv	pro:per
you	go	pro:per	v
pull	it	v	pro:per
it	flat	pro:per	n
Mama	help	n:prop	v
help	you	v	pro:per
ooh		v
okay	you	co	pro:per
you	do	pro:per	v
do	it	v	pro:per
oh	clever	co	adj
clever	girl	adj	n
who	do&PAST	pro:int	mod
do&PAST	you	mod	pro:per
you	see	pro:per	v
see	at	v	prep
at	the	prep	det:art
the	park	det:art	v
park	this	v	pro:dem
this	afternoon	pro:dem	n
Gwww		n:prop
do&PAST	you	v	pro:per
you	play	pro:per	v
play	with	v	prep
with	Gwww	prep	n:prop
Eleanor		n:prop
ah		co
what	have	pro:int	v
have	you	v	pro:per
you	be&PASTP	pro:per	aux
be&PASTP	do-PRESP	aux	part
oh		co
have	you	v	pro:per
you	found	pro:per	v
found	all	v	qn
all	your	qn	det:poss
your	cup-PL	det:poss	n
where	be&PAST	adv:int	aux
be&PAST	they	aux	pro:sub
ah		co
for	tea	prep	n
tea	Eleanor	n	n:prop
what	will	pro:int	mod
will	Mama	mod	n:prop
Mama	drink	n:prop	n
can	you	mod	pro:per
you	make	pro:per	v
make	Mama	v	n:prop
Mama	a	n:prop	det:art
latte		n
mm	thank	co	v
thank	you	v	pro:per
do&PAST	you	v	pro:per
you	put&ZERO	pro:per	v
put&ZERO	sugar	v	n
sugar	in	n	adv
one	for	pro:indef	prep
[truncated: 375,152 more rows]
